# Supplementary material for: The Psychonauts’ Benzodiazepines; Quantitative Structure-Activity Relationship (QSAR) Analysis and Docking Prediction of Their Biological Activity
Source: MDPI journal article supplement (doi:10.3390/ph14080720), 2021-07-26
Supplement: s1 [file s1]

**Table S5. Predicted value of biological activity (log1/c) for the 101 DBZDs identified by NPSfinder®. Log1/c represents the logarithm of the reciprocal of the molar inhibitory concentration (IC50)(nM) required to displace 50% of [3H]-diazepam from rat cerebral cortex.**

**Note: The molecules are listed in decreasing order of predicted log1/c. The higher log1/c values should correspond to a higher biological activity.**

| Molecule                                  | SMILES                                                              | Predicted log1/c |
|-------------------------------------------|---------------------------------------------------------------------|------------------|
| <b>High predicted biological activity</b> |                                                                     |                  |
| Ro 09-9212                                | <chem>Clc1c(C2=NCC(=O)Nc3sc(Cl)cc23)cccc1</chem>                    | 9.40             |
| Ro 07-5193                                | <chem>Clc1c(c(F)ccc1)C1=NCC(=O)Nc2c1cc(Cl)cc2</chem>                | 9.06             |
| Ro 20-8065                                | <chem>Clc1c(Cl)cc2NC(=O)CN=C(c3c(F)cccc3)c2c1</chem>                | 9.04             |
| Ro 07-5220                                | <chem>Clc1c(c(Cl)ccc1)C1=NCC(=O)N(C)c2c1cc(Cl)cc2</chem>            | 8.95             |
| Ro 07-3953                                | <chem>Clc1cc2C(c3c(F)cccc3F)=NCC(=O)Nc2cc1</chem>                   | 8.81             |
| Flucotizolam                              | <chem>Clc1sc2-n3c(C)nnc3CN=C(c3c(F)cccc3)c2c1</chem>                | 8.77             |
| Ciclotizolam                              | <chem>Brc1sc2-n3c(C4CCCC4)nnc3CN=C(c3c(Cl)cccc3)c2c1</chem>         | 8.77             |
| Flubrotizolam                             | <chem>Brc1sc2-n3c(C)nnc3CN=C(c3c(F)cccc3)c2c1</chem>                | 8.67             |
| Phenazepam                                | <chem>Brc1cc2C(c3c(Cl)cccc3)=NCC(=O)Nc2cc1</chem>                   | 8.61             |
| Ro 07-9749                                | <chem>Ic1cc2C(c3c(F)cccc3)=NCC(=O)Nc2cc1</chem>                     | 8.60             |
| Clonazolam                                | <chem>Clc1c(C2=NCc3n(c(C)nn3)-c3c2cc([N+](=O)[O-])cc3)cccc1</chem>  | 8.58             |
| Ro 15-9270                                | <chem>Clc1c(C=2c3c(-n4c(C)nnc4CC=2)ccc([N+](=O)[O-])c3)cccc1</chem> | 8.52             |
| Climazolam                                | <chem>Clc1c(C2=NCc3n(c(C)nc3)-c3c2cc(Cl)cc3)cccc1</chem>            | 8.49             |
| Flunitrazolam                             | <chem>Fc1c(C2=NCc3n(c(C)nn3)-c3c2cc([N+](=O)[O-])cc3)cccc1</chem>   | 8.47             |
| Ro 20-8552                                | <chem>Clc1c(C)cc2C(c3c(F)cccc3)=NCC(=O)Nc2c1</chem>                 | 8.42             |
| Methyl Clonazepam                         | <chem>Clc1c(C2=NCC(=O)N(C)c3c2cc([N+](=O)[O-])cc3)cccc1</chem>      | 8.40             |
| Reclazepam                                | <chem>Clc1c(C2=NCCN(C=3OCC(=O)N=3)c3c2cc(Cl)cc3)cccc1</chem>        | 8.39             |
| Uldazepam                                 | <chem>Clc1c(C2=NCC(NOCC=C)=Nc3c2cc(Cl)cc3)cccc1</chem>              | 8.39             |
| Zapizolam                                 | <chem>Clc1c(C2=NCc3n(-c4c2nc(Cl)cc4)cnn3)cccc1</chem>               | 8.38             |
| Ethyl Dirazepate                          | <chem>Clc1c(C2=NC(C(=O)OCC)C(=O)Nc3c2cc(Cl)cc3)cccc1</chem>         | 8.35             |
| Difludiazepam (RO- 07-4065)               | <chem>Clc1cc2C(c3c(F)cccc3F)=NCC(=O)N(C)c2cc1</chem>                | 8.35             |
| Metizolam                                 | <chem>Clc1c(C2=NCc3n(-c4sc(CC)cc24)cnn3)cccc1</chem>                | 8.35             |
| Etizolam                                  | <chem>Clc1c(C2=NCc3n(c(C)nn3)-c3sc(CC)cc23)cccc1</chem>             | 8.34             |
| Desmethylnitrazolam                       | <chem>Clc1c(C2=NCc3n(-c4c2cc(Cl)cc4)cnn3)cccc1</chem>               | 8.32             |
| Flubromazepam                             | <chem>Brc1cc2C(c3c(F)cccc3)=NCC(=O)Nc2cc1</chem>                    | 8.30             |
| Ro 13-3780                                | <chem>Brc1cc2C(c3c(F)cccc3F)=NCC(=O)N(C)c2cc1</chem>                | 8.26             |
| Lopirazepam                               | <chem>Clc1c(C2=NC(O)C(=O)Nc3c2nc(Cl)cc3)cccc1</chem>                | 8.24             |
| Cloniprazepam                             | <chem>Clc1c(C2=NCC(=O)N(CC3CC3)c3c2cc([N+](=O)[O-])cc3)cccc1</chem> | 8.23             |
| Nifoxipam ( 3-OH-Norflunitrazepam)        | <chem>Fc1c(C2=NC(O)C(=O)Nc3c2cc([N+](=O)[O-])cc3)cccc1</chem>       | 8.21             |
| Phenazolam ( Clobromazolam, DM-ii-90)     | <chem>Brc1cc2C(c3c(Cl)cccc3)=NCc3n(c(C)nn3)-c2cc1</chem>            | 8.20             |
| Diclazepam                                | <chem>Clc1c(C2=NCC(=O)N(C)c3c2cc(Cl)cc3)cccc1</chem>                | 8.19             |
| 4'-Chlorodiazepam                         | <chem>Clc1cc2C(c3ccc(Cl)cc3)=NCC(=O)N(C)c2cc1</chem>                | 8.19             |
| 3-Hydroxyphenazepam                       | <chem>Brc1cc2C(c3c(Cl)cccc3)=NC(O)C(=O)Nc2cc1</chem>                | 8.16             |
| Bentazepam                                | <chem>O=C1Nc2sc3c(c2C(c2cccc2)=NC1)CCCC3</chem>                     | 8.16             |

|                                             |                                                                     |      |
|---------------------------------------------|---------------------------------------------------------------------|------|
| Cinazepam                                   | <chem>BrC1CC2C(c3c(Cl)cccc3)=NC(OC(=O)CCC(=O)O)C(=O)Nc2cc1</chem>   | 8.16 |
| Flualprazolam                               | <chem>Clc1cc2C(c3c(F)cccc3)=NCc3n(c(C)nn3)-c2cc1</chem>             | 8.15 |
| Metaclozepam                                | <chem>BrC1CC2C(c3c(Cl)cccc3)=NCC(COC)N(C)c2cc1</chem>               | 8.14 |
| Fluetizolam                                 | <chem>Fc1c(C2=NCc3n(c(C)nn3)-c3sc(CC)cc23)cccc1</chem>              | 8.14 |
| Pynazolam                                   | <chem>O=[N+](O-)[c1cc2C(c3ncccc3)=NCc3n(c(C)nn3)-c2cc1</chem>       | 8.13 |
| Desmethylnitrazolam                         | <chem>O=[N+](O-)[c1cc2C(c3cccc3)=NCc3n(-c2cc1)cn3</chem>            | 8.11 |
| Nitrazolam                                  | <chem>O=[N+](O-)[c1cc2C(c3cccc3)=NCc3n(c(C)nn3)-c2cc1</chem>        | 8.07 |
| Flubromazolam                               | <chem>BrC1CC2C(c3c(F)cccc3)=NCc3n(c(C)nn3)-c2cc1</chem>             | 8.00 |
| <b>Medium predicted biological activity</b> |                                                                     |      |
| Fletazepam                                  | <chem>Clc1cc2C(c3c(F)cccc3)=NCC(=O)N(CC(F)(F)F)c2cc1</chem>         | 7.99 |
| 7-BPDBD                                     | <chem>BrC1CC2C(c3cccc3)=NCC(=O)Nc2cc1</chem>                        | 7.90 |
| Tuclazepam                                  | <chem>Clc1c(C2=NCC(CO)N(C)c3c2cc(Cl)cc3)cccc1</chem>                | 7.88 |
| SH-053-R-CH3-2'F                            | <chem>Fc1c(C2=NC(C)c3c(C(=O)OCC)ncn3-c3c2cc(C#C)cc3)cccc1</chem>    | 7.81 |
| Pyclazolam                                  | <chem>Clc1cc2C(c3ncccc3)=NCc3n(c(C)nn3)-c2cc1</chem>                | 7.80 |
| RO 21-8137                                  | <chem>Clc1cc2C(c3c(F)cccc3)=NCc3c(C(=O)N)ncn3-c2cc1</chem>          | 7.79 |
| Estazolam                                   | <chem>Clc1cc2C(c3cccc3)=NCc3n(-c2cc1)cn3</chem>                     | 7.78 |
| Pyeazolam (SH-TRI-108)                      | <chem>C(C)[c1cc2C(c3ncccc3)=NCc3n(c(C)nn3)-c2cc1</chem>             | 7.78 |
| Flutoprazepam                               | <chem>Clc1cc2C(c3c(F)cccc3)=NCC(=O)N(CC3CC3)c2cc1</chem>            | 7.77 |
| Rilmazolam                                  | <chem>Clc1c(C2=NCc3n(nc(C(=O)N(C)C)n3)-c3c2cc(Cl)cc3)cccc1</chem>   | 7.77 |
| Deschloroetizolam                           | <chem>C(C)c1sc2-n3c(C)nnc3CN=C(c3cccc3)c2c1</chem>                  | 7.73 |
| Zometapine                                  | <chem>Clc1cc(C2=NCCNc3n(C)nc(C)c23)ccc1</chem>                      | 7.65 |
| Pypazolam                                   | <chem>BrC1CC2C(c3ncccc3)=NCc3n(c(C)nn3)-c2cc1</chem>                | 7.64 |
| Imidazenil                                  | <chem>BrC1c(C2=NCc3c(C(=O)N)ncn3-c3c2cc(F)cc3)cccc1</chem>          | 7.64 |
| Menitrazepam                                | <chem>O=[N+](O-)[c1cc2C(C3=CCCC3)=NCC(=O)N(C)c2cc1</chem>           | 7.60 |
| Bromazolam                                  | <chem>BrC1CC2C(c3cccc3)=NCc3n(c(C)nn3)-c2cc1</chem>                 | 7.59 |
| MP-iii-022                                  | <chem>Fc1c(C2=NC(C)c3c(C(=O)NC)ncn3-c3c2cc(C#C)cc3)cccc1</chem>     | 7.58 |
| Ro 05-4608                                  | <chem>Clc1c(C2=NCC(=O)N(C)c3c2cccc3)cccc1</chem>                    | 7.55 |
| Cyprazepam                                  | <chem>Clc1cc2C(=[N+](O-))CC(NCC3CC3)=Nc2cc1c1cccc1</chem>           | 7.53 |
| Triflunordazepam                            | <chem>FC(F)(F)c1cc2C(c3cccc3)=NCC(=O)Nc2cc1</chem>                  | 7.52 |
| Quazepam                                    | <chem>Clc1cc2C(c3c(F)cccc3)=NCC(=S)N(CC(F)(F)F)c2cc1</chem>         | 7.51 |
| N-Methylbromazepam                          | <chem>BrC1CC2C(c3ncccc3)=NCC(=O)N(C)c2cc1</chem>                    | 7.48 |
| Flutemazepam                                | <chem>Clc1cc2C(c3c(F)cccc3)=NC(O)C(=O)N(C)c2cc1</chem>              | 7.48 |
| Thionordazepam                              | <chem>Clc1cc2C(c3cccc3)=NCC(=S)Nc2cc1</chem>                        | 7.45 |
| Iomazenil                                   | <chem>Ic1c2C(=O)N(C)Cc3c(C(=O)OCC)ncn3-c2ccc1</chem>                | 7.44 |
| QH-II-066                                   | <chem>O=C1N(C)c2c(C(c3cccc3)=NC1)cc(C#C)cc2</chem>                  | 7.42 |
| CP-1414S                                    | <chem>O=[N+](O-)[c1cc2N(c3cccc3)C(=O)CC(N)=Nc2cc1</chem>            | 7.42 |
| Lofendazam                                  | <chem>Clc1cc2N(c3cccc3)C(=O)CCNc2cc1</chem>                         | 7.41 |
| Tofisopam                                   | <chem>O(C)c1c(OC)ccc(C2=NN=C(C)C(CC)c3c2cc(OC)c(OC)c3)c1</chem>     | 7.36 |
| Fluadinazolam                               | <chem>Clc1cc2C(c3c(F)cccc3)=NCc3n(c(CN(C)C)nn3)-c2cc1</chem>        | 7.33 |
| Remimazolam                                 | <chem>BrC1CC2C(c3ncccc3)=NC(CCC(=O)OC)c3n(c(C)cn3)-c2cc1</chem>     | 7.32 |
| Ethyl Carfluzepate                          | <chem>Clc1cc2C(c3c(F)cccc3)=NC(C(=O)OCC)C(=O)N(C(=O)NC)c2cc1</chem> | 7.24 |
| Doxefazepam                                 | <chem>Clc1cc2C(c3c(F)cccc3)=NC(O)C(=O)N(CCO)c2cc1</chem>            | 7.23 |

|                                          |                                                                                    |      |
|------------------------------------------|------------------------------------------------------------------------------------|------|
| Cinolazepam                              | <chem>Clc1cc2C(c3c(F)cccc3)=NC(O)C(=O)N(CCC#N)c2cc1</chem>                         | 7.20 |
| FG-8205                                  | <chem>Clc1c2C(=O)N(C)Cc3c(-c4nc(C(C)C)on4)ncn3-c2ccc1</chem>                       | 7.17 |
| Ro 17-1812                               | <chem>Clc1c2C(=O)N3C(c4c(C(=O)OCC5CC5)ncn4-c2ccc1)CC3</chem>                       | 7.13 |
| Ro 15-4941                               | <chem>Clc1c2C(=O)N3C(c4c(C(=O)OCC)ncn4-c2ccc1)CCC3</chem>                          | 7.09 |
| Fluloprazolam                            | <chem>Fc1c(C2=NCC=3N(C(=O)C(=CN4CCN(C)CC4)N=3)c3c2cc([N+](=O)[O-])cc3)cccc1</chem> | 7.08 |
| JQ1                                      | <chem>Clc1ccc(C2=NC(CC(=O)OC(C)(C)C)c3n(c(C)nn3)-c3sc(C)c(C)c23)cc1</chem>         | 7.06 |
| PWZ-029                                  | <chem>Clc1cc2C(=O)N(C)Cc3c(COC)ncn3-c2cc1</chem>                                   | 7.04 |
| Arfendazam                               | <chem>Clc1cc2N(c3cccc3)C(=O)CCN(C(=O)OCC)c2cc1</chem>                              | 7.03 |
| Flupyrzapon/ Zolazepam                   | <chem>Fc1c(C2=NCC(=O)N(C)c3n(C)nc(C)c23)cccc1</chem>                               | 7.00 |
| Sulazepam                                | <chem>Clc1cc2C(c3cccc3)=NCC(=S)N(C)c2cc1</chem>                                    | 7.00 |
| <b>Low predicted biological activity</b> |                                                                                    |      |
| Mexazolam                                | <chem>Clc1c(C23OCC(C)N2CC(=O)Nc2c3cc(Cl)cc2)cccc1</chem>                           | 6.98 |
| Premazepam                               | <chem>O=C1Nc2c(c(C)n(C)c2)C(c2cccc2)=NC1</chem>                                    | 6.97 |
| Ripazepam                                | <chem>O=C1Nc2c(C)nn(CC)c2C(c2cccc2)=NC1</chem>                                     | 6.96 |
| Tolufazepam                              | <chem>Clc1c(C2=NCC(=O)N(CCS(=O)(=O)c3ccc(C)cc3)c3c2cc(Cl)cc3)ccc1</chem>           | 6.95 |
| 7-Aminoflunitrazepam                     | <chem>Fc1c(C2=NCC(=O)N(C)c3c2cc(N)cc3)cccc1</chem>                                 | 6.95 |
| Elfazepam                                | <chem>Clc1cc2C(c3c(F)cccc3)=NCC(=O)N(CCS(=O)(=O)CC)c2cc1</chem>                    | 6.85 |
| Clazolam                                 | <chem>Clc1cc2c(N(C)C(=O)CN3C2c2c(cccc2)CC3)cc1</chem>                              | 6.78 |
| Fosazepam                                | <chem>Clc1cc2C(c3cccc3)=NCC(=O)N(CP(=O)(C)C)c2cc1</chem>                           | 6.66 |
| Pivoxazepam                              | <chem>Clc1cc2C(c3cccc3)=NC(OC(=O)C(C)(C)C(=O)Nc2cc1</chem>                         | 6.45 |
| Triflubazam                              | <chem>FC(F)(F)c1cc2N(c3cccc3)C(=O)CC(=O)N(C)c2cc1</chem>                           | 6.43 |
| Gidazepam                                | <chem>Brclcc2C(c3cccc3)=NCC(=O)N(CC(=O)NN)c2cc1</chem>                             | 6.34 |
| Ro 48-8684                               | <chem>Fc1cc2C(=O)N(C)Cc3c(-c4oc(CN(CCC)CCC)cn4)ncn3-c2cc1</chem>                   | 6.33 |
| Ro 48-6791                               | <chem>Fc1cc2C(=O)N(C)Cc3c(-c4nc(CN(CCC)CCC)on4)ncn3-c2cc1</chem>                   | 6.29 |
| Flutazolam                               | <chem>Clc1cc2C3(c4c(F)cccc4)OCCN3CC(=O)N(CCO)c2cc1</chem>                          | 6.26 |
| Zomebazam                                | <chem>O=C1N(C)c2n(C)nc(C)c2N(c2cccc2)C(=O)C1</chem>                                | 5.95 |
| Carburazepam                             | <chem>Clc1cc2C(N(C(=O)N)CC(=O)N(C)c2cc1)c1cccc1</chem>                             | 5.86 |
