# Supplementary material for: The Psychonauts’ Benzodiazepines; Quantitative Structure-Activity Relationship (QSAR) Analysis and Docking Prediction of Their Biological Activity
Source: MDPI journal article supplement (doi:10.3390/ph14080720), 2021-07-26
Supplement: s1 [file s1]

**Table S1: List of websites monitored by the NPSfinder® web crawler, November 2017- November 2020, surface web only.**

| <b>N</b> | <b>Website name</b>                                                                             |
|----------|-------------------------------------------------------------------------------------------------|
| 1        | Avalonmagicplants.com                                                                           |
| 2        | Azarius.net                                                                                     |
| 3        | Bluelight.org                                                                                   |
| 4        | Bluemorphotours.com                                                                             |
| 5        | Cannabis.net                                                                                    |
| 6        | Chemeurope.com                                                                                  |
| 7        | Committedpsychonaut.tumblr.com                                                                  |
| 8        | Consolidated Index of Controlled Substances                                                     |
| 9        | Daath.hu/psychonauts                                                                            |
| 10       | Dancesafe.org                                                                                   |
| 11       | Deviantart.com/psychonaut-a                                                                     |
| 12       | Druglibrary.org                                                                                 |
| 13       | Drugs.tripsit.me                                                                                |
| 14       | Drugs-forum.com                                                                                 |
| 15       | Drugs-plaza.com                                                                                 |
| 16       | Dutch-headshop.eu                                                                               |
| 17       | Ecstasydata.org                                                                                 |
| 18       | Elephantos.com                                                                                  |
| 19       | Energycontrol.org                                                                               |
| 20       | Entheogen-network.com/forums                                                                    |
| 21       | Erowid.org                                                                                      |
| 22       | Eusynth.org                                                                                     |
| 23       | Everything2.com/title/Psychonaut                                                                |
| 24       | Fungifun.org                                                                                    |
| 25       | Hedweb.com                                                                                      |
| 26       | Hipforums.com/forum                                                                             |
| 27       | Isomerdesign.com                                                                                |
| 28       | Knehnay.home.xs4all.nl                                                                          |
| 29       | Kratomshop.com                                                                                  |
| 30       | Legal-high-inhaltsstoffe.de                                                                     |
| 31       | Mindstates.org                                                                                  |
| 32       | Mycotopia.net                                                                                   |
| 33       | Natmedtalk.com                                                                                  |
| 34       | Npsproject.eu                                                                                   |
| 35       | Peyote.com/peyolink.html                                                                        |
| 36       | Psychedelic-library.org                                                                         |
| 37       | Psychonaut.ca                                                                                   |
| 38       | Psychonaut.fr                                                                                   |
| 39       | Psychonautdocs.com                                                                              |
| 40       | Psychonautwiki.org                                                                              |
| 41       | Psyconauts.tripod.com                                                                           |
| 42       | Reddit.com and drug-related subreddits (e.g. Reddit.com/r/Psychonaut/; Reddit.com/r/shroomers/) |

|    |                                                      |
|----|------------------------------------------------------|
| 43 | <a href="http://Shayanashop.com">Shayanashop.com</a> |
| 44 | <a href="http://Sjamaan.com">Sjamaan.com</a>         |
| 45 | <a href="http://Tripzine.com">Tripzine.com</a>       |
| 46 | <a href="http://Tryptamind.com">Tryptamind.com</a>   |
| 47 | <a href="http://Urban75.net">Urban75.net</a>         |
| 48 | <a href="#">Wikipedia List of designer drugs</a>     |
| 49 | <a href="http://Zamnesia.com">Zamnesia.com</a>       |
