# Supplementary material for: The Psychonauts’ Benzodiazepines; Quantitative Structure-Activity Relationship (QSAR) Analysis and Docking Prediction of Their Biological Activity
Source: MDPI journal article supplement (doi:10.3390/ph14080720), 2021-07-26
Supplement: s1 [file s1]

**Table S4: Drug-like parameters and predicted log1/c values for the 101 DBZDs identified by the NPSfinder. The parameters considered were : MW (molecular weight),TP vdw SA (Total polar vdw surface area ), SlogP ( Log Octanol/Water Partition Coefficient), lip\_acc (Lipinski Acceptor Count), lip\_don (Lipinski Donor Count), lip\_druglike (Lipinski Druglike test), lip\_violation (Lipinski Violation count).**

| Molecule                    | MW    | TP VDW SA | SlogP | lip_acc | lip_don | lip_druglike | lip_violation | Predicted log1/c |
|-----------------------------|-------|-----------|-------|---------|---------|--------------|---------------|------------------|
| Ro 09-9212                  | 311.2 | 58.2      | 3.8   | 3       | 1       | 1            | 0             | 9.4              |
| Ro 07-5193                  | 323.2 | 70.1      | 3.9   | 3       | 1       | 1            | 0             | 9.1              |
| Ro 20-8065                  | 323.2 | 70.1      | 3.9   | 3       | 1       | 1            | 0             | 9.0              |
| Ro 07-5220                  | 353.6 | 52.5      | 4.5   | 3       | 0       | 1            | 0             | 8.9              |
| Ro 07-3953                  | 306.7 | 82.0      | 3.4   | 3       | 1       | 1            | 0             | 8.8              |
| Flucotizolam                | 332.8 | 17.6      | 4.0   | 4       | 0       | 1            | 0             | 8.8              |
| Ciclotizolam                | 461.8 | 5.7       | 6.4   | 4       | 0       | 1            | 1             | 8.8              |
| Flubrotizolam               | 377.2 | 17.6      | 4.2   | 4       | 0       | 1            | 0             | 8.7              |
| Phenazepam                  | 349.6 | 58.2      | 3.9   | 3       | 1       | 1            | 0             | 8.6              |
| Ro 07-9749                  | 380.2 | 70.1      | 3.2   | 3       | 1       | 1            | 0             | 8.6              |
| Clonazolam                  | 353.8 | 46.3      | 3.8   | 7       | 0       | 1            | 0             | 8.6              |
| Ro 15-9270                  | 352.8 | 40.6      | 3.9   | 6       | 0       | 1            | 0             | 8.5              |
| Climazolam                  | 342.2 | 11.4      | 5.1   | 3       | 0       | 1            | 1             | 8.5              |
| Flunitrazolam               | 337.3 | 58.2      | 3.2   | 7       | 0       | 1            | 0             | 8.5              |
| Ro 20-8552                  | 302.7 | 70.1      | 3.6   | 3       | 1       | 1            | 0             | 8.4              |
| Methyl Clonazepam           | 329.7 | 93.1      | 3.1   | 6       | 0       | 1            | 0             | 8.4              |
| Reclazepam                  | 374.2 | 74.2      | 3.6   | 5       | 0       | 1            | 0             | 8.4              |
| Uldazepam                   | 360.2 | 39.3      | 4.6   | 4       | 1       | 1            | 0             | 8.4              |
| Zapizolam                   | 330.2 | 36.2      | 3.6   | 5       | 0       | 1            | 0             | 8.4              |
| Ethyl Dirazepate            | 377.2 | 75.4      | 3.7   | 5       | 1       | 1            | 0             | 8.4              |
| Difludiazepam (RO- 07-4065) | 320.7 | 76.3      | 3.4   | 3       | 0       | 1            | 0             | 8.4              |
| Metizolam                   | 328.8 | 30.5      | 4.2   | 4       | 0       | 1            | 0             | 8.4              |
| Etizolam                    | 342.9 | 5.7       | 4.5   | 4       | 0       | 1            | 0             | 8.3              |
| Desmethylnitrazolam         | 329.2 | 30.5      | 4.2   | 4       | 0       | 1            | 0             | 8.3              |
| Flubromazepam               | 333.2 | 70.1      | 3.4   | 3       | 1       | 1            | 0             | 8.3              |
| Ro 13-3780                  | 365.2 | 76.3      | 3.5   | 3       | 0       | 1            | 0             | 8.3              |
| Lopirazepam                 | 322.2 | 56.5      | 2.5   | 5       | 2       | 1            | 0             | 8.2              |

|                                       |       |       |     |   |   |   |   |     |
|---------------------------------------|-------|-------|-----|---|---|---|---|-----|
| Cloniprazepam                         | 369.8 | 93.1  | 3.8 | 6 | 0 | 1 | 0 | 8.2 |
| Nifoxipam ( 3-OH-Norflunitrazepam)    | 315.3 | 103.4 | 1.8 | 7 | 2 | 1 | 0 | 8.2 |
| Phenazolam ( Clobromazolam, DM-ii-90) | 387.7 | 5.7   | 4.6 | 4 | 0 | 1 | 0 | 8.2 |
| Diclazepam                            | 319.2 | 52.5  | 3.8 | 3 | 0 | 1 | 0 | 8.2 |
| 4'-Chlorodiazepam                     | 319.2 | 52.5  | 3.8 | 3 | 0 | 1 | 0 | 8.2 |
| 3-Hydroxyphenazepam                   | 365.6 | 50.8  | 3.2 | 4 | 2 | 1 | 0 | 8.2 |
| Bentazepam                            | 296.4 | 58.2  | 3.4 | 3 | 1 | 1 | 0 | 8.2 |
| Cinazepam                             | 465.7 | 109.9 | 3.6 | 7 | 2 | 1 | 0 | 8.2 |
| Flualprazolam                         | 326.8 | 17.6  | 4.0 | 4 | 0 | 1 | 0 | 8.1 |
| Metaclazepam                          | 393.7 | 8.2   | 4.4 | 3 | 0 | 1 | 0 | 8.1 |
| Fluetizolam                           | 326.4 | 17.6  | 4.0 | 4 | 0 | 1 | 0 | 8.1 |
| Pynazolam                             | 320.3 | 52.0  | 2.5 | 8 | 0 | 1 | 0 | 8.1 |
| Desmethylnitrazolam                   | 305.3 | 71.1  | 2.8 | 7 | 0 | 1 | 0 | 8.1 |
| Nitrazolam                            | 319.3 | 46.3  | 3.1 | 7 | 0 | 1 | 0 | 8.1 |
| Flubromazolam                         | 371.2 | 17.6  | 4.1 | 4 | 0 | 1 | 0 | 8.0 |
| Fletazepam                            | 370.7 | 93.8  | 4.2 | 3 | 0 | 1 | 0 | 8.0 |
| 7-BPDBD                               | 315.2 | 58.2  | 3.2 | 3 | 1 | 1 | 0 | 7.9 |
| Tuclazepam                            | 335.2 | 41.3  | 3.6 | 3 | 1 | 1 | 0 | 7.9 |
| SH-053-R-CH3-2'F                      | 387.4 | 54.1  | 4.2 | 5 | 0 | 1 | 0 | 7.8 |
| Pyclazolam                            | 309.8 | 11.4  | 3.2 | 5 | 0 | 1 | 0 | 7.8 |
| RO 21-8137                            | 354.8 | 49.8  | 3.4 | 5 | 2 | 1 | 0 | 7.8 |
| Estazolam                             | 294.7 | 30.5  | 3.5 | 4 | 0 | 1 | 0 | 7.8 |
| Pyeazolam (SH-TRI-108)                | 299.3 | 11.4  | 2.6 | 5 | 0 | 1 | 0 | 7.8 |
| Flutoprazepam                         | 342.8 | 64.4  | 4.1 | 3 | 0 | 1 | 0 | 7.8 |
| Rilmazolam                            | 400.3 | 49.1  | 3.9 | 6 | 0 | 1 | 0 | 7.8 |
| Deschloroetizolam                     | 308.4 | 5.7   | 3.8 | 4 | 0 | 1 | 0 | 7.7 |
| Zometapine                            | 274.8 | 5.7   | 3.0 | 4 | 1 | 1 | 0 | 7.7 |
| Pypazolam                             | 354.2 | 11.4  | 3.4 | 5 | 0 | 1 | 0 | 7.6 |
| Imidazenil                            | 399.2 | 49.8  | 3.5 | 5 | 2 | 1 | 0 | 7.6 |
| Menitrazepam                          | 299.3 | 93.1  | 2.9 | 6 | 0 | 1 | 0 | 7.6 |
| Bromazolam                            | 353.2 | 5.7   | 4.0 | 4 | 0 | 1 | 0 | 7.6 |

|                        |       |       |     |   |   |   |   |     |
|------------------------|-------|-------|-----|---|---|---|---|-----|
| MP-iii-022             | 372.4 | 55.5  | 3.4 | 5 | 1 | 1 | 0 | 7.6 |
| Ro 05-4608             | 284.7 | 52.5  | 3.2 | 3 | 0 | 1 | 0 | 7.6 |
| Cyprazepam             | 339.8 | 66.5  | 3.7 | 4 | 1 | 1 | 0 | 7.5 |
| Triflunordazepam       | 304.3 | 67.2  | 3.8 | 3 | 1 | 1 | 0 | 7.5 |
| Quazepam               | 386.8 | 26.6  | 5.0 | 2 | 0 | 1 | 1 | 7.5 |
| N-Methylbromazepam     | 330.2 | 58.2  | 2.7 | 4 | 0 | 1 | 0 | 7.5 |
| Flutemazepam           | 318.7 | 57.1  | 2.6 | 4 | 1 | 1 | 0 | 7.5 |
| Thionordazepam         | 286.8 | 5.7   | 3.9 | 2 | 1 | 1 | 0 | 7.4 |
| Iomazenil              | 411.2 | 63.0  | 2.5 | 6 | 0 | 1 | 0 | 7.4 |
| QH-II-066              | 274.3 | 52.5  | 2.5 | 3 | 0 | 1 | 0 | 7.4 |
| CP-1414S               | 296.3 | 72.8  | 2.7 | 7 | 2 | 1 | 0 | 7.4 |
| Lofendazam             | 272.7 | 26.5  | 3.8 | 3 | 1 | 1 | 0 | 7.4 |
| Tofisopam              | 382.5 | 10.0  | 4.4 | 6 | 0 | 1 | 0 | 7.4 |
| Fluadinazolam          | 369.8 | 17.6  | 4.0 | 5 | 0 | 1 | 0 | 7.3 |
| Remimazolam            | 439.3 | 47.8  | 4.3 | 6 | 0 | 1 | 0 | 7.3 |
| Ethyl Carfluzepate     | 417.8 | 118.3 | 2.9 | 7 | 1 | 1 | 0 | 7.2 |
| Doxefazepam            | 348.8 | 92.7  | 2.0 | 5 | 2 | 1 | 0 | 7.2 |
| Cinolazepam            | 357.8 | 57.1  | 2.9 | 5 | 1 | 1 | 0 | 7.2 |
| FG-8205                | 357.8 | 62.2  | 3.6 | 7 | 0 | 1 | 0 | 7.2 |
| Ro 17-1812             | 357.8 | 63.0  | 3.1 | 6 | 0 | 1 | 0 | 7.1 |
| Ro 15-4941             | 345.8 | 63.0  | 3.1 | 6 | 0 | 1 | 0 | 7.1 |
| Fluloprazolam          | 448.5 | 90.4  | 2.4 | 9 | 0 | 1 | 0 | 7.1 |
| JQ1                    | 457.0 | 36.5  | 5.6 | 6 | 0 | 1 | 1 | 7.1 |
| PWZ-029                | 291.7 | 34.7  | 2.8 | 5 | 0 | 1 | 0 | 7.0 |
| Arfendazam             | 344.8 | 61.8  | 4.4 | 5 | 0 | 1 | 0 | 7.0 |
| Flupyrzapon/ Zolazepam | 286.3 | 64.4  | 2.0 | 5 | 0 | 1 | 0 | 7.0 |
| Sulazepam              | 300.8 | 5.7   | 4.0 | 2 | 0 | 1 | 0 | 7.0 |
| Mexazolam              | 363.2 | 34.7  | 4.2 | 4 | 1 | 1 | 0 | 7.0 |
| Premazepam             | 253.3 | 58.2  | 2.5 | 4 | 1 | 1 | 0 | 7.0 |
| Ripazepam              | 268.3 | 58.2  | 2.3 | 5 | 1 | 1 | 0 | 7.0 |
| Tolufazepam            | 487.4 | 126.8 | 5.0 | 5 | 0 | 1 | 0 | 6.9 |

|                      |       |       |     |   |   |   |   |     |
|----------------------|-------|-------|-----|---|---|---|---|-----|
| 7-Aminoflunitrazepam | 283.3 | 64.4  | 2.2 | 4 | 2 | 1 | 0 | 6.9 |
| Elfazepam            | 408.9 | 152.3 | 3.1 | 5 | 0 | 1 | 0 | 6.8 |
| Clazolam             | 312.8 | 26.5  | 3.4 | 3 | 0 | 1 | 0 | 6.8 |
| Fosazepam            | 360.8 | 151.9 | 3.0 | 4 | 0 | 1 | 0 | 6.7 |
| Pivoxazepam          | 370.8 | 81.6  | 4.0 | 5 | 1 | 1 | 0 | 6.4 |
| Triflubazam          | 334.3 | 62.1  | 4.0 | 4 | 0 | 1 | 0 | 6.4 |
| Gidazepam            | 387.2 | 79.0  | 1.6 | 6 | 3 | 1 | 0 | 6.3 |
| Ro 48-8684           | 411.5 | 65.2  | 4.4 | 7 | 0 | 1 | 0 | 6.3 |
| Ro 48-6791           | 412.5 | 74.2  | 3.8 | 8 | 0 | 1 | 0 | 6.3 |
| Flutazolam           | 376.8 | 76.6  | 2.7 | 5 | 1 | 1 | 0 | 6.3 |
| Zomebazam            | 284.3 | 53.0  | 2.1 | 6 | 0 | 1 | 0 | 5.9 |
| Carburazepam         | 329.8 | 57.5  | 2.9 | 5 | 2 | 1 | 0 | 5.9 |
