# Supplementary material for: The Psychonauts’ Benzodiazepines; Quantitative Structure-Activity Relationship (QSAR) Analysis and Docking Prediction of Their Biological Activity
Source: MDPI journal article supplement (doi:10.3390/ph14080720), 2021-07-26
Supplement: s1 [file s1]

**Table S2: List of the designer benzodiazepines officially reported by the UNODC and EMCDDA (February 2021).**

| <b>Designer Benzodiazepines</b>                                       | <b>UNODC</b> | <b>EMCDDA</b> |
|-----------------------------------------------------------------------|--------------|---------------|
| Alprazolam triazolobenzophenone derivative                            | Y            | Y             |
| 2-ethyl-4-phenyl-6H-thieno[3,2-f][1,2,4]triazolo[4,3-a][1,4]diazepine | Y            | N             |
| 3-hydroxyphenazepam                                                   | Y            | Y             |
| 4-chlorodiazepam                                                      | Y            | Y             |
| Adinazolam                                                            | Y            | Y             |
| Bromazolam                                                            | Y            | Y             |
| Clobromazolam                                                         | Y            | Y             |
| Clonazolam / Clonitrazolam                                            | Y            | Y             |
| Cloniprazepam                                                         | Y            | Y             |
| Deschloroetizolam                                                     | Y            | Y             |
| Desmethylflunitrazepam (Fonazepam)                                    | Y            | Y             |
| Diclazepam ( chlorodiazepam)                                          | Y            | Y             |
| Etizolam                                                              | Y            | Y             |
| Flualprazolam                                                         | Y            | Y             |
| Flubromazepam                                                         | Y            | Y             |
| Flubromazolam                                                         | Y            | Y             |
| Fluclotizolam                                                         | Y            | Y             |
| Flunitrazolam                                                         | Y            | Y             |
| Meclonazepam                                                          | Y            | Y             |
| Methyl clonazepam                                                     | Y            | Y             |
| Metizolam                                                             | Y            | Y             |
| Nifoxipam                                                             | Y            | Y             |
| Nitrazolam                                                            | Y            | Y             |
| Norfludiazepam                                                        | Y            | Y             |
| Phenazepam                                                            | Y            | Y             |
| Pyrazolam                                                             | Y            | Y             |
| Ro-07-4065 (Difludiazepam)                                            | Y            | Y             |
| Thionordazepam                                                        | Y            | Y             |
| Zapizolam                                                             | Y            | N             |
| Bentazepam                                                            | N            | Y             |
| Tofisopam                                                             | N            | Y             |
