# Supplementary material for: The Psychonauts’ Benzodiazepines; Quantitative Structure-Activity Relationship (QSAR) Analysis and Docking Prediction of Their Biological Activity
Source: MDPI journal article supplement (doi:10.3390/ph14080720), 2021-07-26
Supplement: s1 [file s1]

**Table S3: Composition of the training and test set used to build the QSAR model The experimentally derived [57] and predicted values of log1/c for each molecules are presented as well.**

| Training set     |                                                                         |         |              |
|------------------|-------------------------------------------------------------------------|---------|--------------|
| Molecule         | Smile                                                                   | log 1/c | Pred log 1/c |
| Brotizolam       | <chem>Brc1sc2-n3c(C)nnc3CN=C(c3c(Cl)cccc3)c2c1</chem>                   | 8.92    | 8.94         |
| Meclonazepam     | <chem>Clc1c(C2=NC(C)C(=O)Nc3c2cc([N+](=O)[O-])cc3)cccc1</chem>          | 8.92    | 8.60         |
| Ro 11-1465       | <chem>Clc1c(C2=NCc3n(c(C)nn3)-c3sc(Cl)cc23)cccc1</chem>                 | 8.85    | 8.99         |
| Ro 05-4435       | <chem>Fc1c(C2=NCC(=O)Nc3c2cc([N+](=O)[O-])cc3)cccc1</chem>              | 8.82    | 8.69         |
| Ro 14-1636       | <chem>Ic1sc2-n3c(C)nnc3CN=C(c3c(Cl)cccc3)c2c1</chem>                    | 8.82    | 9.26         |
| Clonazepam       | <chem>Clc1c(C2=NCC(=O)Nc3c2cc([N+](=O)[O-])cc3)cccc1</chem>             | 8.74    | 8.86         |
| Delorazepam      | <chem>Clc1c(C2=NCC(=O)Nc3c2cc(Cl)cc3)cccc1</chem>                       | 8.74    | 8.65         |
| Ro 05-4082       | <chem>Clc1c(C2=NCC(=O)N(C)c3c2cc([N+](=O)[O-])cc3)cccc1</chem>          | 8.66    | 8.40         |
| Ro 07-9957       | <chem>Ic1cc2C(c3c(F)cccc3)=NCC(=O)N(C)c2cc1</chem>                      | 8.54    | 8.15         |
| Ro 11-7800       | <chem>Clc1c(C2=NCc3n(c(CN)nn3)-c3sc(Cl)cc23)cccc1</chem>                | 8.54    | 8.53         |
| Etizolam         | <chem>Clc1c(C2=NCc3n(c(C)nn3)-c3sc(CC)cc23)cccc1</chem>                 | 8.51    | 8.34         |
| Ro 11-5073       | <chem>Clc1cc2C(c3c(F)cccc3)=NC(C)c3n(c(C)nn3)-c2cc1</chem>              | 8.48    | 7.87         |
| Ro 11-5074       | <chem>Clc1c(C2=NC(SC)c3n(c(C)nn3)-c3c2cc([N+](=O)[O-])cc3)cccc1</chem>  | 8.47    | 8.53         |
| Lorazepam        | <chem>Clc1c(C2=NC(O)C(=O)Nc3c2cc(Cl)cc3)cccc1</chem>                    | 8.46    | 8.20         |
| Ro 05-3590       | <chem>FC(F)(F)c1c(C2=NCC(=O)Nc3c2cc([N+](=O)[O-])cc3)cccc1</chem>       | 8.46    | 8.35         |
| Ro 11-4878       | <chem>Clc1cc2C(c3c(F)cccc3)=NC(C)C(=O)Nc2cc1</chem>                     | 8.46    | 8.14         |
| Ro 17-4582       | <chem>Clc1c(C2=NCc3n(c(C)nn3)-c3sccc23)cccc1</chem>                     | 8.46    | 8.43         |
| Flunitrazepam    | <chem>Fc1c(C2=NCC(=O)N(C)c3c2cc([N+](=O)[O-])cc3)cccc1</chem>           | 8.42    | 8.21         |
| Ro 11-6679       | <chem>S(C)C1N=C(c2c(F)cccc2)c2c(-n3c(C)nnc13)ccc([N+](=O)[O-])c2</chem> | 8.40    | 8.31         |
| Hydroxytriazolam | <chem>Clc1c(C2=NCc3n(c(CO)nn3)-c3c2cc(Cl)cc3)cccc1</chem>               | 8.38    | 8.05         |
| U-35005          | <chem>Clc1c(C2=NCc3n(c(C)nn3)-c3c2cccc3)cccc1</chem>                    | 8.37    | 8.31         |
| Midazolam        | <chem>Clc1cc2C(c3c(F)cccc3)=NCc3n(c(C)nc3)-c2cc1</chem>                 | 8.32    | 8.33         |
| Ro 05-6822       | <chem>Fc1c(C2=NCC(=O)N(C)c3c2cc(F)cc3)cccc1</chem>                      | 8.29    | 7.78         |
| Ro 20-7078       | <chem>Clc1cc2C(c3c(F)cccc3)=NC(Cl)C(=O)Nc2cc1</chem>                    | 8.28    | 8.61         |
| Ro 11-6896       | <chem>Fc1c(C2=NC(C)C(=O)N(C)c3c2cc([N+](=O)[O-])cc3)cccc1</chem>        | 8.15    | 7.94         |
| Ro 05-6820       | <chem>Fc1c(C2=NCC(=O)Nc3c2cc(F)cc3)cccc1</chem>                         | 8.13    | 8.26         |
| Ro 21-5205       | <chem>Clc1cc2C(c3c(F)cccc3)=NCc3c(C(=O)OC)ncn3-c2cc1</chem>             | 8.13    | 8.30         |
| Diazepam         | <chem>Clc1cc2C(c3cccc3)=NCC(=O)N(C)c2cc1</chem>                         | 8.09    | 7.53         |
| Ro 07-1986       | <chem>C1N1C(=O)CN=C(c2c(F)cccc2)c2c1ccc(CCN)c2</chem>                   | 8.08    | 7.45         |
| Estazolam        | <chem>Clc1cc2C(c3cccc3)=NCc3n(-c2cc1)cnn3</chem>                        | 8.07    | 7.78         |
| Nordiazepam      | <chem>Clc1cc2C(c3cccc3)=NCC(=O)Nc2cc1</chem>                            | 8.03    | 8.00         |
| Nitrazepam       | <chem>O=[N+](O-)c1cc2C(c3cccc3)=NCC(=O)Nc2cc1</chem>                    | 8.00    | 8.29         |
| Ro 22-1892       | <chem>Clc1cc2C(c3cccc3)=NCc3c(C(=O)OC(C)C)ncn3-c2cc1</chem>             | 7.92    | 7.56         |
| Ro 05-2904       | <chem>FC(F)(F)c1cc2C(c3cccc3)=NCC(=O)Nc2cc1</chem>                      | 7.89    | 7.52         |
| Ro 16-0529       | <chem>Clc1c2C(c3cccc3)=NCc3c(C(=O)OCC)ncn3-c2ccc1</chem>                | 7.85    | 7.84         |
| Flurazepam       | <chem>Clc1cc2C(c3c(F)cccc3)=NCC(=O)N(CCN(CC)CC)c2cc1</chem>             | 7.83    | 7.36         |
| Ro 15-8670       | <chem>Clc1cc2C(c3cccc3)=NCc3c(C(=O)OCC)ncn3-c2cc1</chem>                | 7.82    | 7.82         |
| Temazepam        | <chem>Clc1cc2C(c3cccc3)=NC(O)C(=O)N(C)c2cc1</chem>                      | 7.80    | 7.07         |
| Ro 05-4865       | <chem>Fc1cc2C(c3cccc3)=NCC(=O)N(C)c2cc1</chem>                          | 7.77    | 7.38         |
| Oxazepam         | <chem>Clc1cc2C(c3cccc3)=NC(O)C(=O)Nc2cc1</chem>                         | 7.74    | 7.53         |
| Ro 20-3053       | <chem>Fc1c(C2=NCC(=O)Nc3c2cc(C(=O)C)cc3)cccc1</chem>                    | 7.74    | 7.69         |

| Alprazolam          | <chem>Clc1cc2C(c3ccccc3)=NCc3n(c(C)nn3)-c2cc1</chem>                 | 7.70           | 7.75                |
|---------------------|----------------------------------------------------------------------|----------------|---------------------|
| Ro 20-5747          | <chem>O=C1Ne2c(C(c3ccccc3)=NC1)cc(C=C)cc2</chem>                     | 7.62           | 7.79                |
| Ro 07-2750          | <chem>Clc1cc2C(c3c(F)cccc3)=NCC(=O)N(CCO)c2cc1</chem>                | 7.61           | 7.68                |
| Ro 21-8482          | <chem>Clc1c(C2=NCc3c(C(=O)N)nc(C)n3-c3c2cc(Cl)cc3)cccc1</chem>       | 7.59           | 7.94                |
| Ro 20-2541          | <chem>Fc1c(C2=NCC(=O)N(C)c3c2cc(C#N)cc3)cccc1</chem>                 | 7.52           | 7.34                |
| Desmethylnitrazepam | <chem>Clc1cc2C(C3=CCCCC3)=NCC(=O)Nc2cc1</chem>                       | 7.47           | 7.85                |
| Tetrazepam          | <chem>Clc1cc2C(C3=CCCCC3)=NCC(=O)N(C)c2cc1</chem>                    | 7.47           | 7.40                |
| Ro 20-2533          | <chem>O=C1Ne2c(C(c3ccccc3)=NC1)cc(CC)cc2</chem>                      | 7.44           | 7.35                |
| Ro 05-3061          | <chem>Fc1cc2C(c3ccccc3)=NCC(=O)Nc2cc1</chem>                         | 7.40           | 7.86                |
| Ro 08-9013          | <chem>ClN1C(=O)CN=C(c2c(F)cccc2)c2c1ccc(CCOCC(=O)N)c2</chem>         | 7.37           | 7.12                |
| Ro 06-7263          | <chem>ClN1C(=O)C(C)N=C(c2ccccc2)c2c1ccc(Cl)c2</chem>                 | 7.31           | 7.92                |
| Ro 08-3026          | <chem>Clc1c(C2=NCC(=O)Nc3c2cc(COCCN)cc3)cccc1</chem>                 | 7.20           | 7.50                |
| Ro 20-1815          | <chem>Fc1c(C2=NCC(=O)N(C)c3c2cc(N)cc3)cccc1</chem>                   | 7.19           | 6.95                |
| Ro 05-4619          | <chem>Clc1c(C2=NCC(=O)Nc3c2cc(N)cc3)cccc1</chem>                     | 7.12           | 7.57                |
| Ro 05-3328          | <chem>Clc1cc2C(c3ccccc3)=NCC(=O)Nc2cc1</chem>                        | 7.06           | 8.00                |
| Halazepam           | <chem>Clc1cc2C(c3ccccc3)=NCC(=O)N(CC(F)(F)F)c2cc1</chem>             | 7.04           | 7.58                |
| Pinazepam           | <chem>Clc1cc2C(c3ccccc3)=NCC(=O)N(CC#C)c2cc1</chem>                  | 7.03           | 7.77                |
| Ro 20-7736          | <chem>Fc1c(C2=NCC(=O)N(C)c3c2cc(NO)cc3)cccc1</chem>                  | 7.02           | 6.67                |
| Adinazolam          | <chem>Clc1cc2C(c3ccccc3)=NCc3n(c(CN(C)C)nn3)-c2cc1</chem>            | 6.87           | 6.92                |
| Ro 17-2221          | <chem>O=C1Ne2c(C(c3ccccc3)=NC1)cc(CCN)cc2</chem>                     | 6.59           | 6.85                |
| Ro 22-4683          | <chem>Fc1c(C2=NCC(=O)N(C(C)(C)C)c3c2cc([N+](=O)[O-])cc3)cccc1</chem> | 6.52           | 7.17                |
| Ro 05-4528          | <chem>O=C1N(C)c2c(C(c3ccccc3)=NC1)cc(C#N)cc2</chem>                  | 6.42           | 6.94                |
| Ro 12-6377          | <chem>Fc1c(C2=NCC(=O)N(C)c3c2cc(NC(=O)NC)cc3)cccc1</chem>            | 6.34           | 6.77                |
| Ro 20-1310          | <chem>Clc1cc2C(c3ccccc3)=NCC(=O)N(C(C)(C)C)c2cc1</chem>              | 6.21           | 6.51                |
| Camazepam           | <chem>Clc1cc2C(c3ccccc3)=NC(OC(=O)N(C)C)C(=O)N(C)c2cc1</chem>        | 6.05           | 6.50                |
| <b>Test set</b>     |                                                                      |                |                     |
| <b>Molecule</b>     | <b>Smile</b>                                                         | <b>log 1/C</b> | <b>PRED log 1/C</b> |
| Prazepam            | <chem>Clc1cc2C(c3ccccc3)=NCC(=O)N(CC3CC3)c2cc1</chem>                | 6.96           | 7.36                |
| Ro 05-2921          | <chem>O=C1Ne2c(C(c3ccccc3)=NC1)cccc2</chem>                          | 6.45           | 7.48                |
| 7-Aminonitrazepam   | <chem>O=C1Ne2c(C(c3ccccc3)=NC1)cc(N)cc2</chem>                       | 6.41           | 7.03                |
| Norfludiazepam      | <chem>Clc1cc2C(c3c(F)cccc3)=NCC(=O)Nc2cc1</chem>                     | 8.70           | 8.41                |
| Ro 05-4336          | <chem>Fc1c(C2=NCC(=O)Nc3c2cccc3)cccc1</chem>                         | 6.51           | 7.87                |
| Ro 05-4520          | <chem>Fc1c(C2=NCC(=O)N(C)c3c2cccc3)cccc1</chem>                      | 7.47           | 7.39                |
| Proflazepam         | <chem>Clc1cc2C(c3c(F)cccc3)=NCC(=O)N(CC(O)CO)c2cc1</chem>            | 6.85           | 7.25                |
| Triazolam           | <chem>CC1=NN=C2N1C3=C(C=C(C=C3)Cl)C(=NC2)C4=CC=CC=C4C1</chem>        | 8.40           | 8.31                |
| 4-hydroxymidazolam  | <chem>Clc1cc2C(c3c(F)cccc3)=NCc3n(c(CO)nc3)-c2cc1</chem>             | 8.35           | 8.03                |
